# Supplementary material for: Multi-omics provide evidence for an anti-inflammatory immune signature and metabolic alterations in patients with Long COVID Syndrome – an exploratory study
Source: bioRxiv or medRxiv preprint supplement (doi:10.1101/2022.07.11.22277499), 2022-07-12
Supplement: Supplementary file [file media-1.pdf]

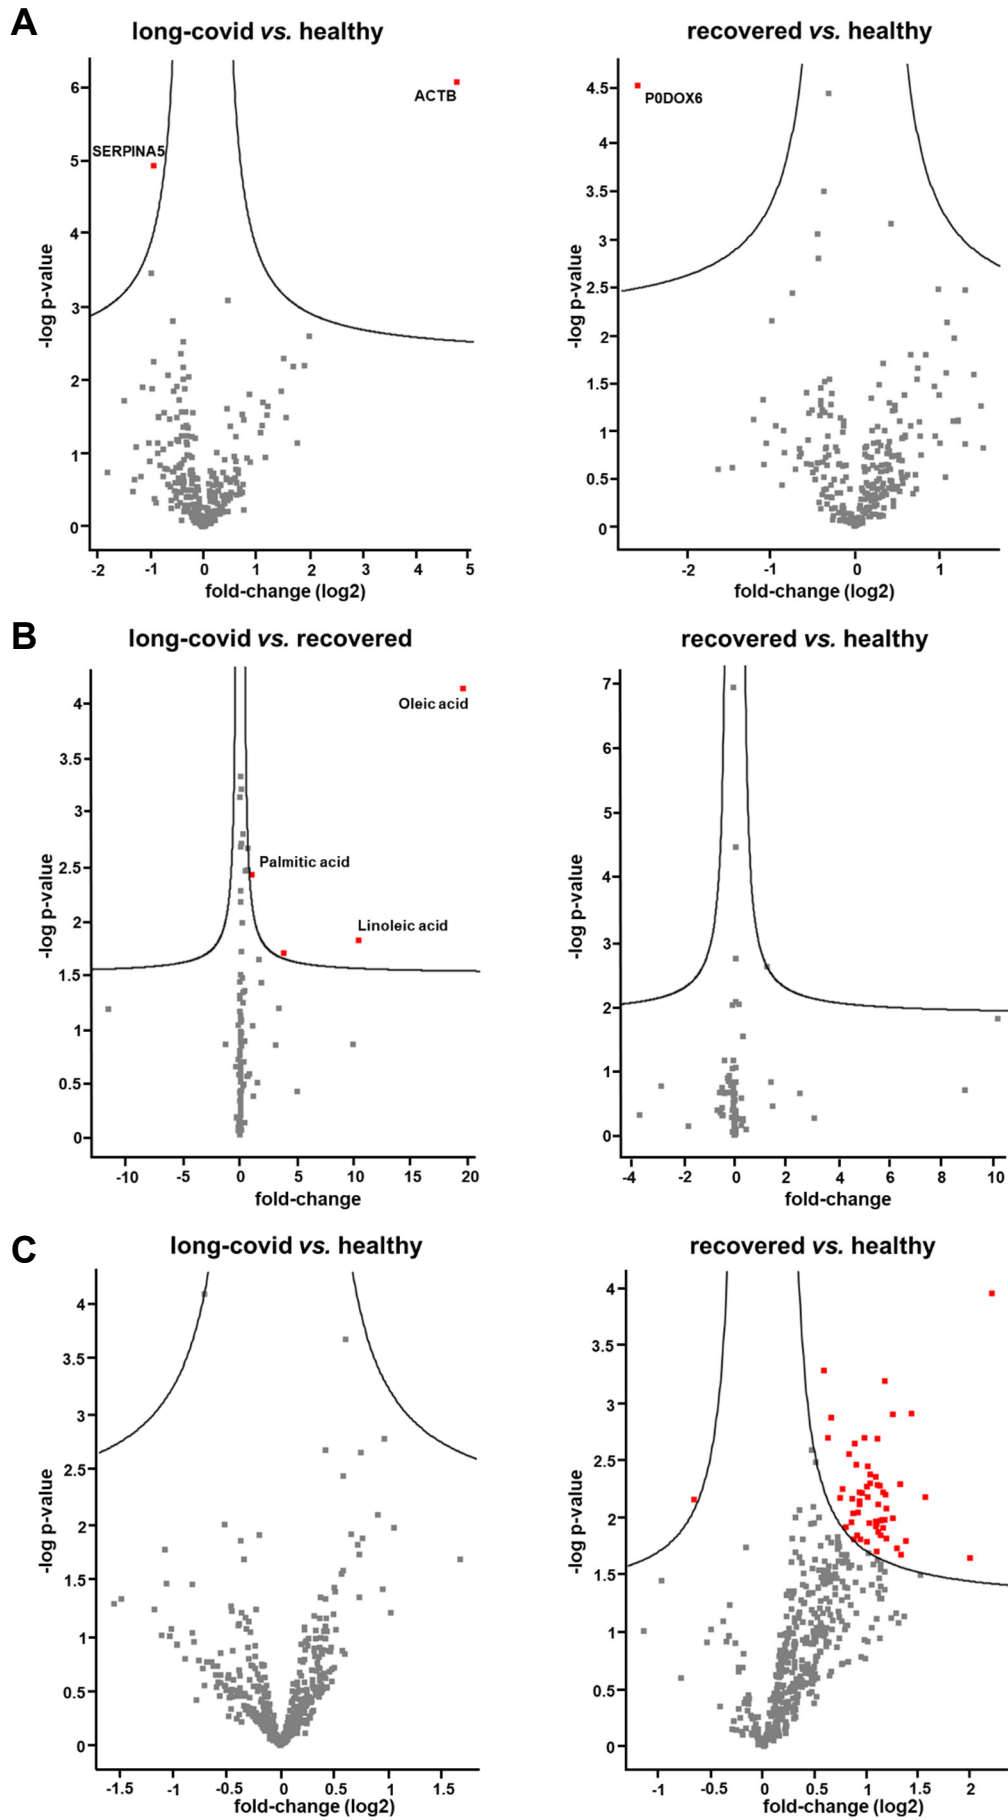

Supplementary Figure S1
